# Supplementary material
Source: PubMed Central journal article supplement (PMC6640455)
Supplement: MPP-12-73-s013.pdf [file MPP-12-73-s013.pdf]

**Table S1** Primers and control plasmids used in RT-PCR analyses.

| Gene                                          | Control plasmid      | Primer               | Sequence                                                             | Fragment size (bp) |
|-----------------------------------------------|----------------------|----------------------|----------------------------------------------------------------------|--------------------|
| <i>NPR1</i>                                   | pAD/NtNPR1 15/588.DQ | NtNPR1-1<br>NtNPR1-3 | 5'-CCGGATCCAGCGGAAGCAGTAGTATATGC<br>5'-TTCCAAGTAGGTGTCTCTGAAAC       | 516                |
| <i>NIM1-like1</i>                             | pGBT9/NtNIM1-like1   | NtNIMI-1<br>NtNIMI-4 | 5'-AAGAATTCATGGCTTGTTCTGCTGAACC<br>5'-GCTGGTCTGCAGGAGTCATG           | 482                |
| <i>NIMIN2c</i>                                | pGBT9/NIMIN2c        | AD-10/2<br>AD-10/1   | 5'-CCGGATCCATATGCTACTTACTATGGACG<br>5'-AAGGATCCGTCTCCGCCTTCTGGTAAAGC | 363                |
| <i>PR-1a</i>                                  | pUC18/Pro35S:PR1a    | PR-60<br>PR-61       | 5'-GGGGATCCATATGCAAATTCTCAACAAGAC<br>5'-AAGGATCCGTATGGACTTTCGCCTC    | 414                |
| small subunit<br>of RuBisco<br>( <i>SSU</i> ) | -                    | SSU1<br>SSU2         | 5'-GGCTTCCTCAGTTCTTTCC<br>5'-GTAGCCTTCTGGCTTGTAGGC                   | 515                |
